# Supplementary material for: Neurexophilin4 is a selectively expressed α-neurexin ligand that modulates specific cerebellar synapses and motor functions
Source: eLife journal article supplement (doi:10.7554/elife.46773), 2019-09-16
Supplement: supp [file elife-46773-supp-v1.zip]

Archive with 11 entries (11 files):
- elife_poa_e46773_Figure_6_figure_supplement_2.pdf
- elife_poa_e46773_Transparent_Reporting_File.pdf
- elife_poa_e46773_Figure_6_figure_supplement_3.pdf
- elife_poa_e46773_Figure_4_figure_supplement_1.pdf
- elife_poa_e46773_Figure_3_figure_supplement_1.pdf
- elife_poa_e46773_Figure_1_source_data_1.docx
- elife_poa_e46773_Figure_6_figure_supplement_1.pdf
- elife_poa_e46773_Figure_7_figure_supplement_1.pdf
- elife_poa_e46773_Figure_3_figure_supplement_2.pdf
- elife_poa_e46773_Figure_1_figure_supplement_1.pdf
- elife_poa_e46773_Figure_2_figure_supplement_1.pdf
