# Supplementary material for: Neurexophilin4 is a selectively expressed α-neurexin ligand that modulates specific cerebellar synapses and motor functions
Source: eLife journal article supplement (doi:10.7554/elife.46773), 2019-09-16
Supplement: supp [file elife-46773-supp-v1.zip › elife_poa_e46773_Figure_1_source_data_1.docx]

**Figure 1-source data 1. Brain regions expressing *Nxph4.***

| Brain circuits | Specific regions |
| --- | --- |
| Olfactory bulb | Glomerular layer |
| Mitral cell |
| Accessory olfactory bulb |
| Cerebral cortex | Layer 6b |
| Sensory circumventricular organs + projections | Subfornical organ |
| Medial preoptic nucleus |
| Lateral hypothalamic area |
| Area postrema |
| Nucleus of vagus nerve |
| Mammillary body + projections | Mammillary bodies |
| Presubiculum |
| Dorsal tegmental nucleus |
| Cerebellar-related circuits | Golgi cells |
| Deep cerebellar nuclei |
| Medial/superior vestibular neucleus |
| Parasolitary nucleus |
| External cuneate nucleus |
| Pontine nuclei |
| Cochlear related circuits | Ventral cochlear nucleus |
| Inferior colliculus |
| Others | Amygdala (BLA, PLCo, PMCo, MePV) |
| Hypothalamus (DMD/DMV) |
| Piriform cortex |
| Zona inserta |
| EW region |
| Paranigral nucleus |
| Locus coeruleus |

BLA: basolateral amygdala

PLCo: posterolateral cortical amygdala

PMCo: posteromedial cortical amygdala

MePV: medial amygdala, posteroventral part

DMD: dorsal medial hypothalamus, dorsal part

DMV: dorsal medial hypothalamus, ventral part
