# Supplementary figures and images for: Neurexophilin4 is a selectively expressed α-neurexin ligand that modulates specific cerebellar synapses and motor functions
Source: eLife journal article supplement (doi:10.7554/elife.46773), 2019-09-16

Figure 6—figure supplement 2

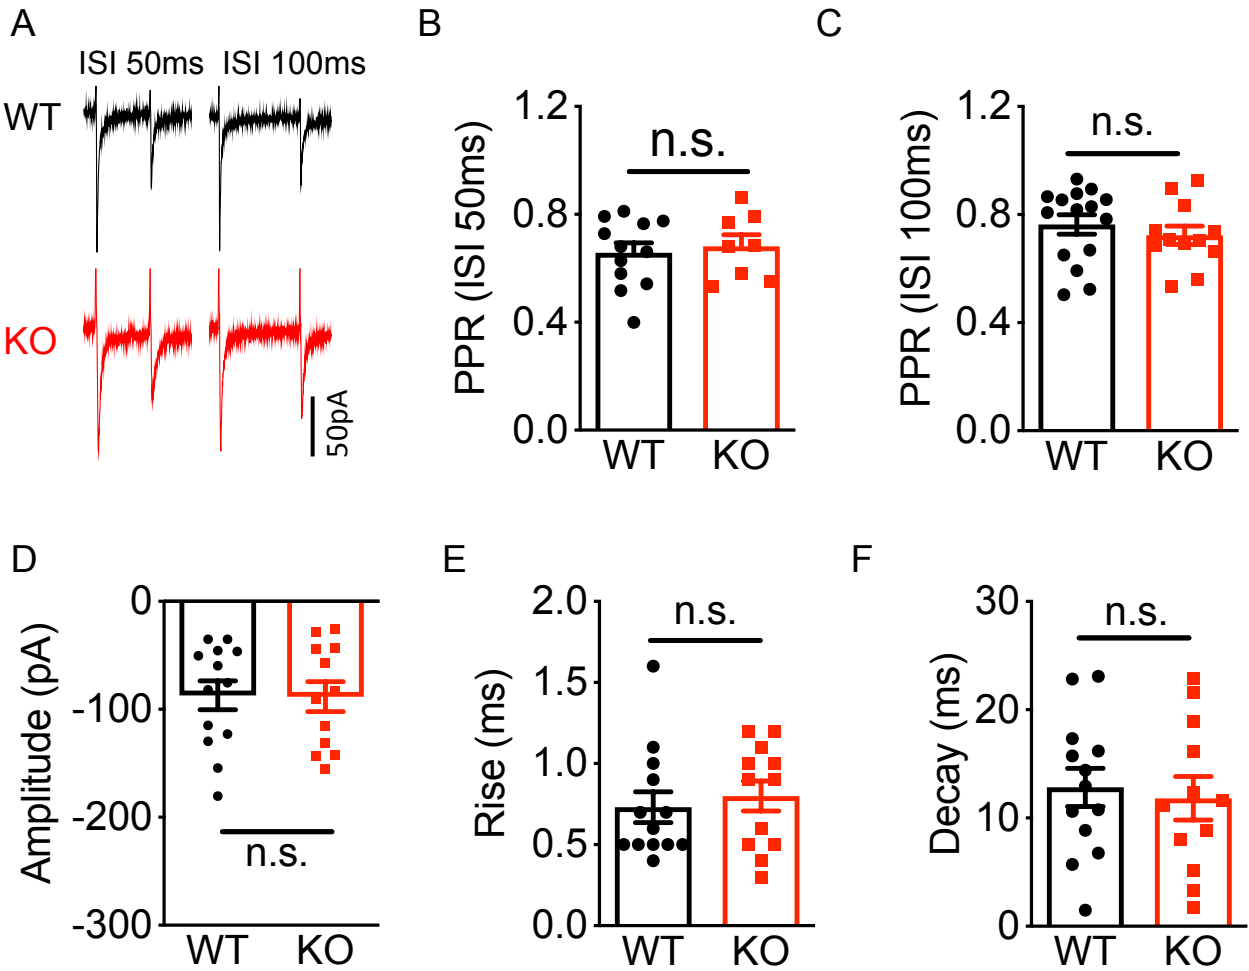

Supplement: supp [file elife-46773-supp-v1.zip › elife_poa_e46773_Figure_6_figure_supplement_2.pdf]

Figure 6—figure supplement 3

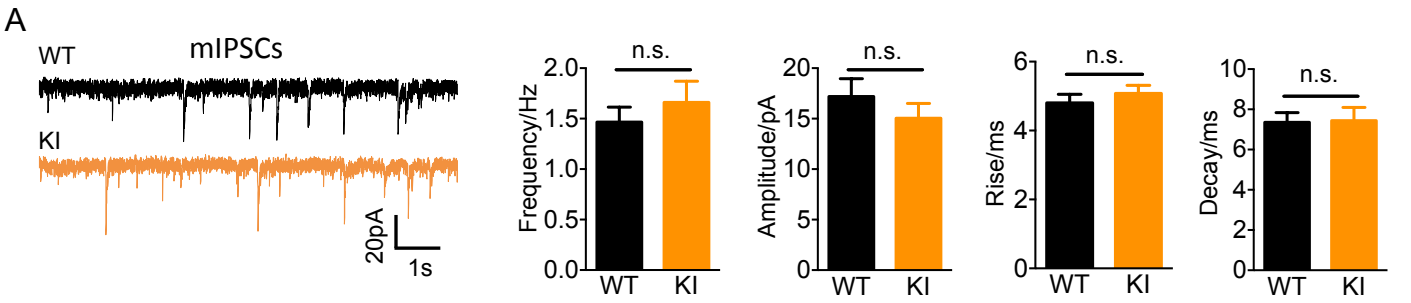

Supplement: supp [file elife-46773-supp-v1.zip › elife_poa_e46773_Figure_6_figure_supplement_3.pdf]

Figure 4–figure supplement 1

A

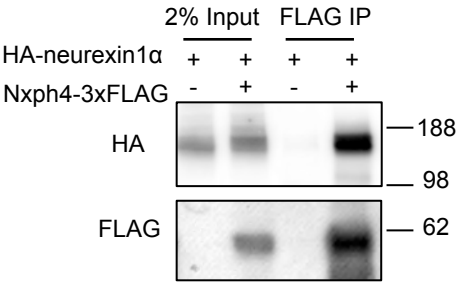

B

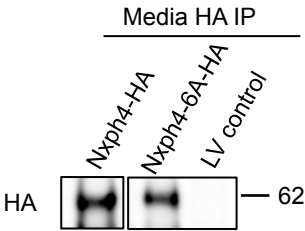

C

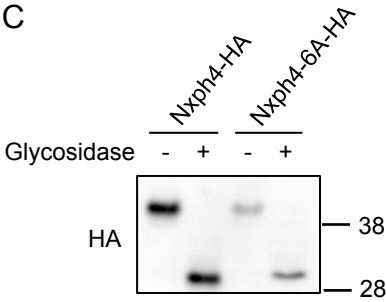

Supplement: supp [file elife-46773-supp-v1.zip › elife_poa_e46773_Figure_4_figure_supplement_1.pdf]

Figure 3-figure supplement 1

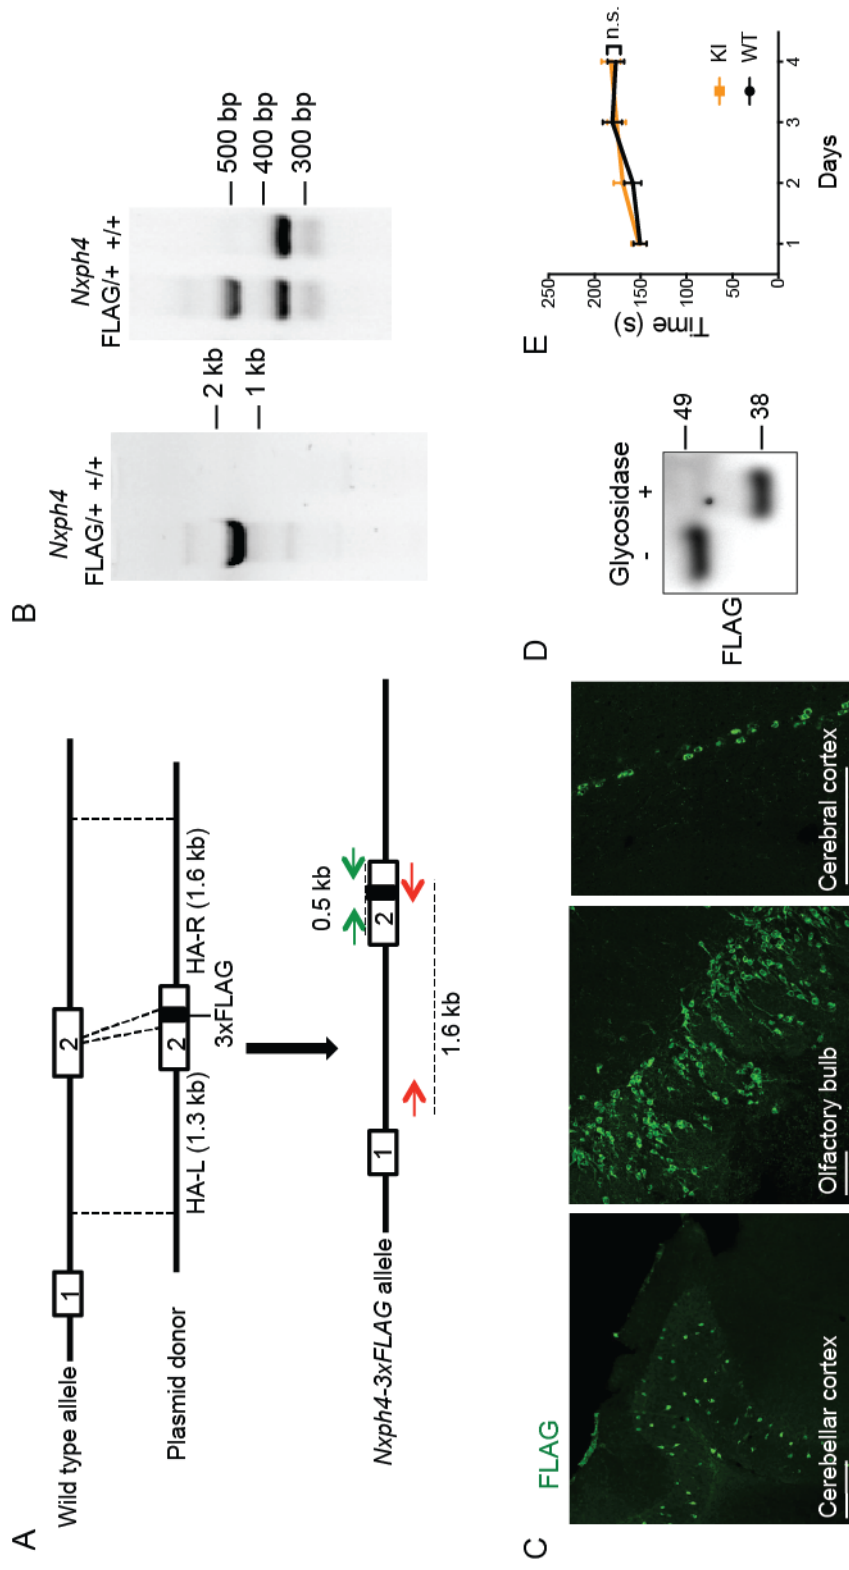

Supplement: supp [file elife-46773-supp-v1.zip › elife_poa_e46773_Figure_3_figure_supplement_1.pdf]

Figure 6—figure supplement 1

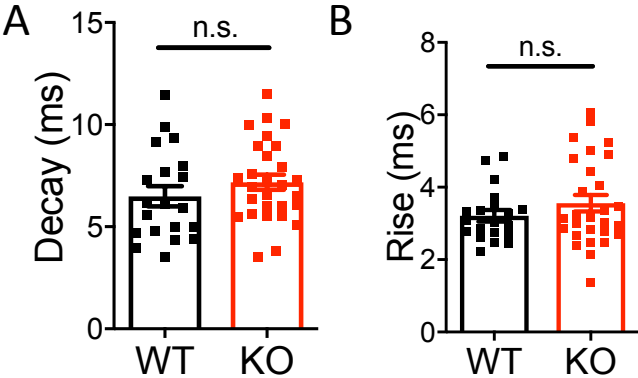

Supplement: supp [file elife-46773-supp-v1.zip › elife_poa_e46773_Figure_6_figure_supplement_1.pdf]

Figure 7—figure supplement 1

A

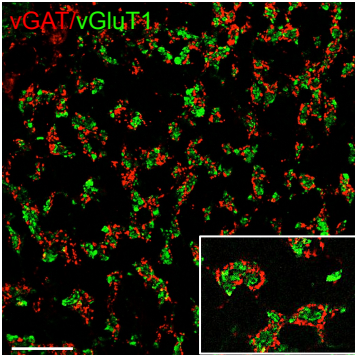

B

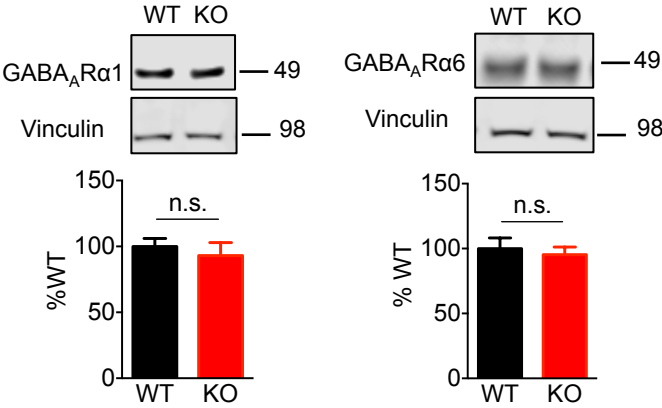

C

GABA<sub>A</sub> Rα1

WT

KO

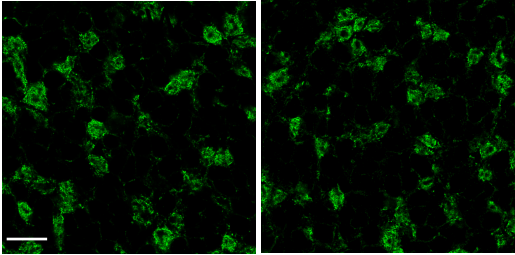

D

GABA<sub>A</sub> Rα6

WT

KO

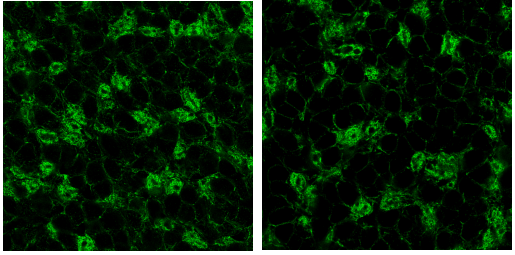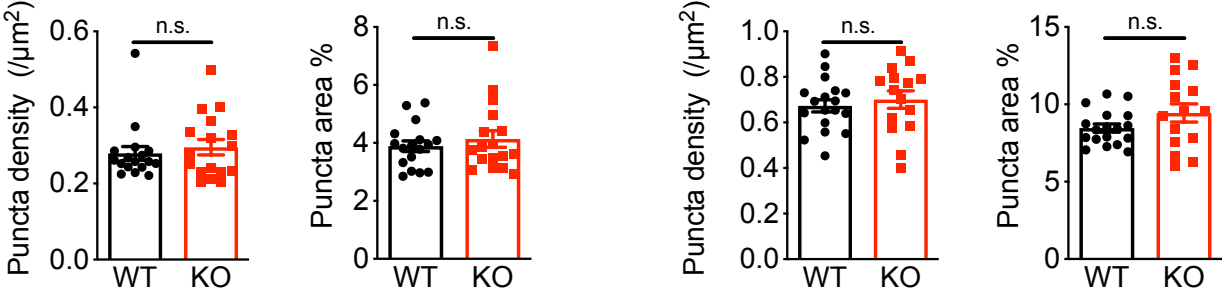

Supplement: supp [file elife-46773-supp-v1.zip › elife_poa_e46773_Figure_7_figure_supplement_1.pdf]

Figure 3–figure supplement 2

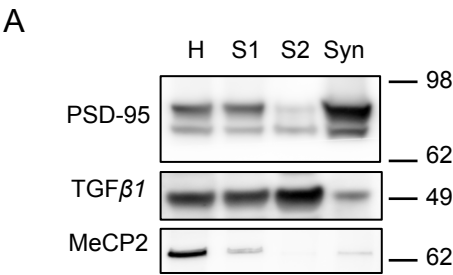

Supplement: supp [file elife-46773-supp-v1.zip › elife_poa_e46773_Figure_3_figure_supplement_2.pdf]

Figure 1—figure supplement 1

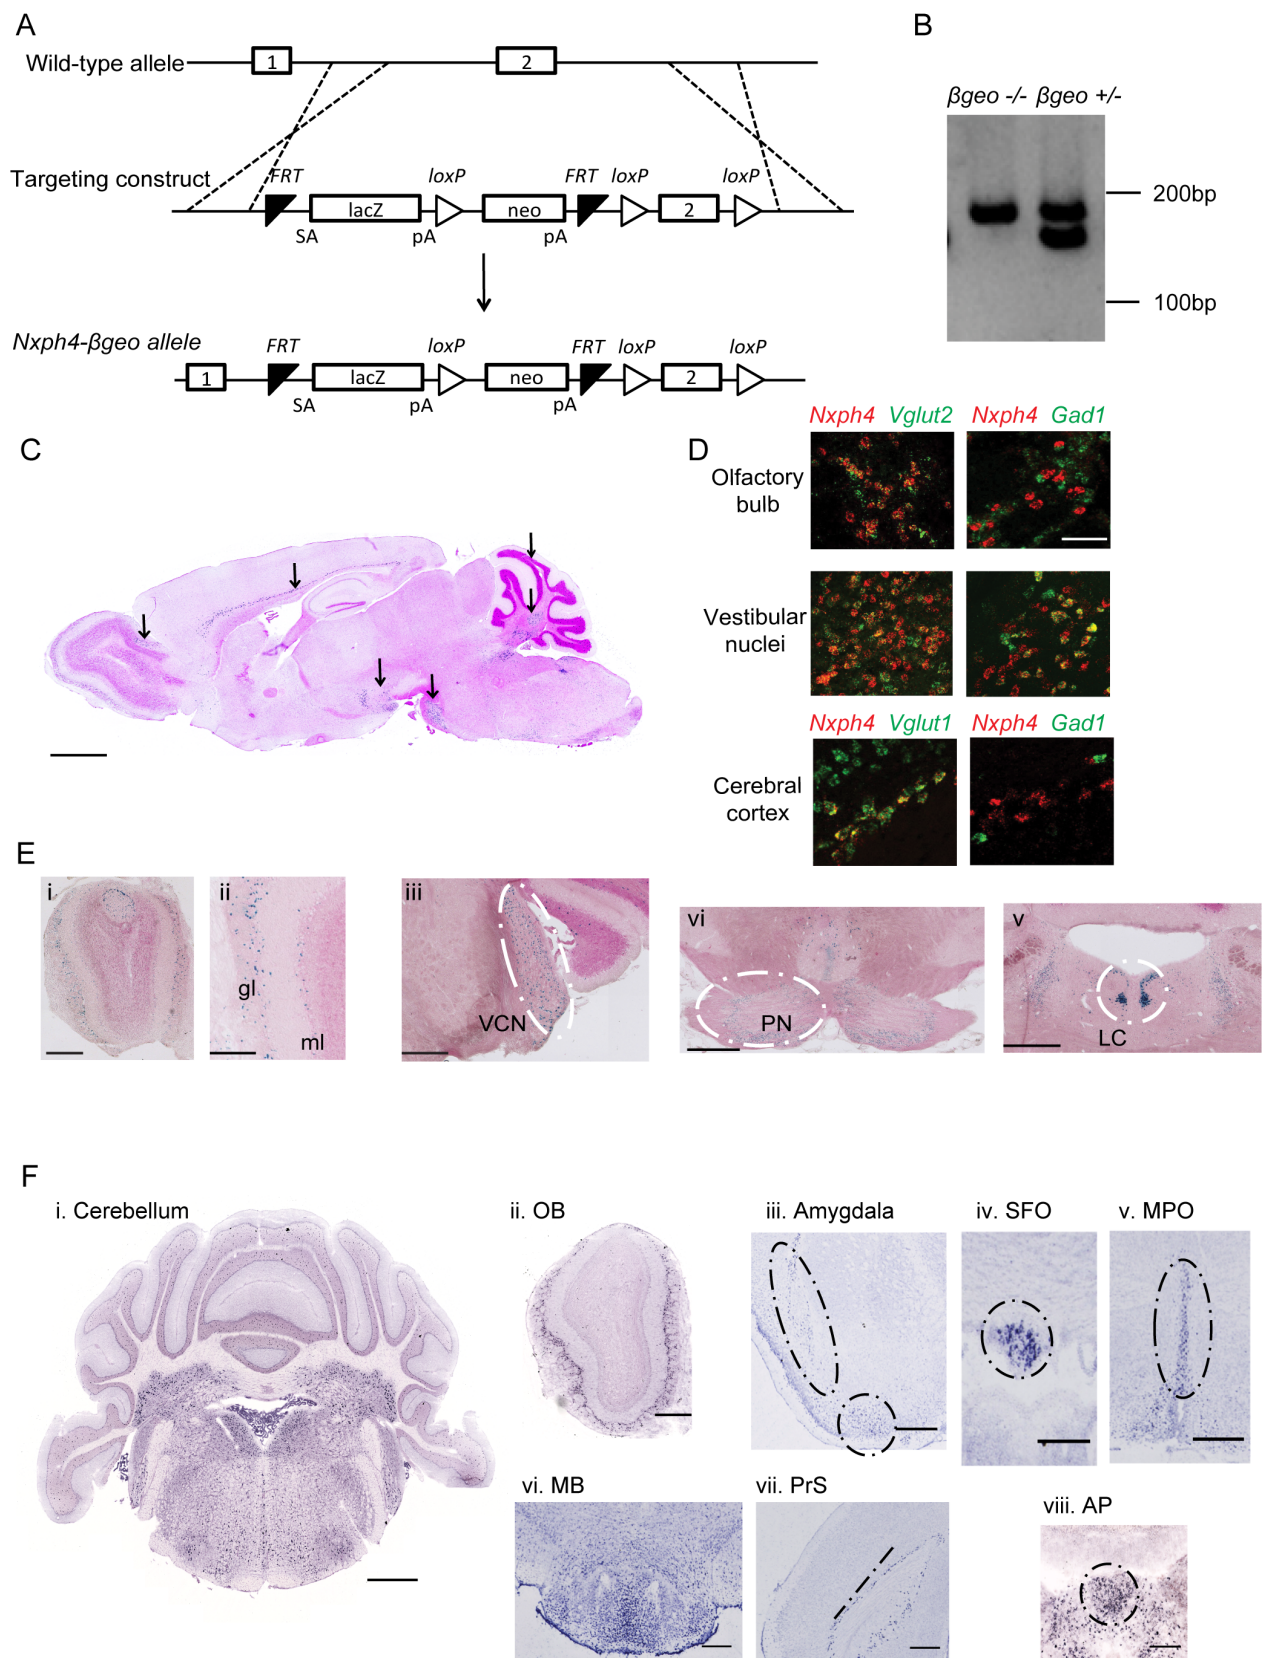

Supplement: supp [file elife-46773-supp-v1.zip › elife_poa_e46773_Figure_1_figure_supplement_1.pdf]

Figure 2—figure supplement 1

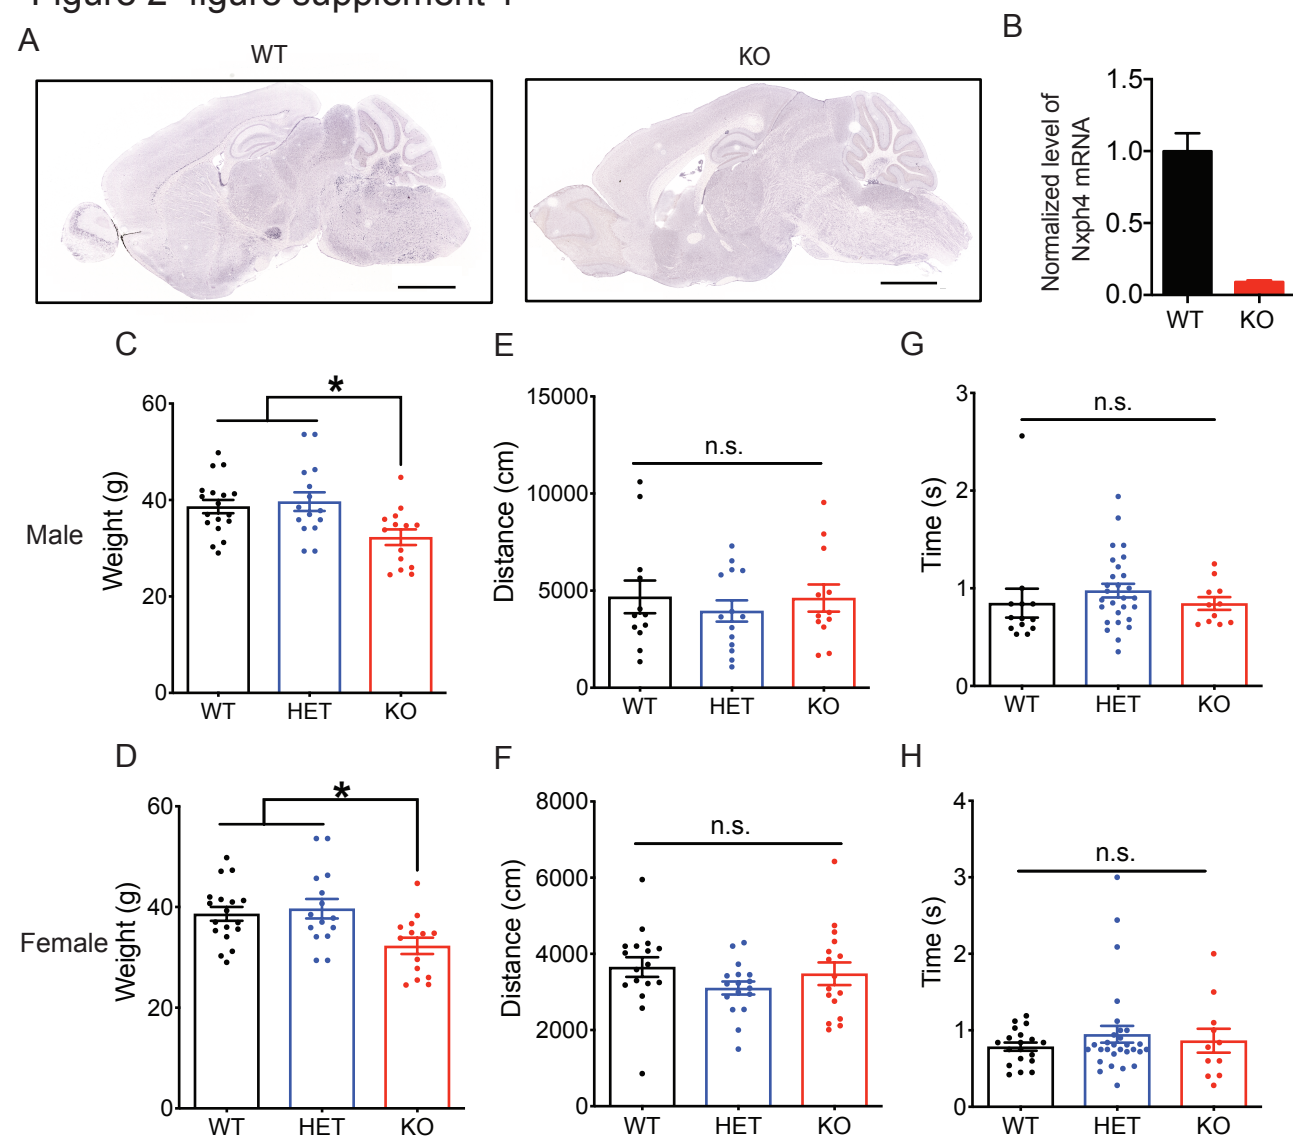

Supplement: supp [file elife-46773-supp-v1.zip › elife_poa_e46773_Figure_2_figure_supplement_1.pdf]
